# Supplementary material
Source: PubMed Central journal article supplement (PMC5714282)

**Unprocessed blots relative to Figure 5A**

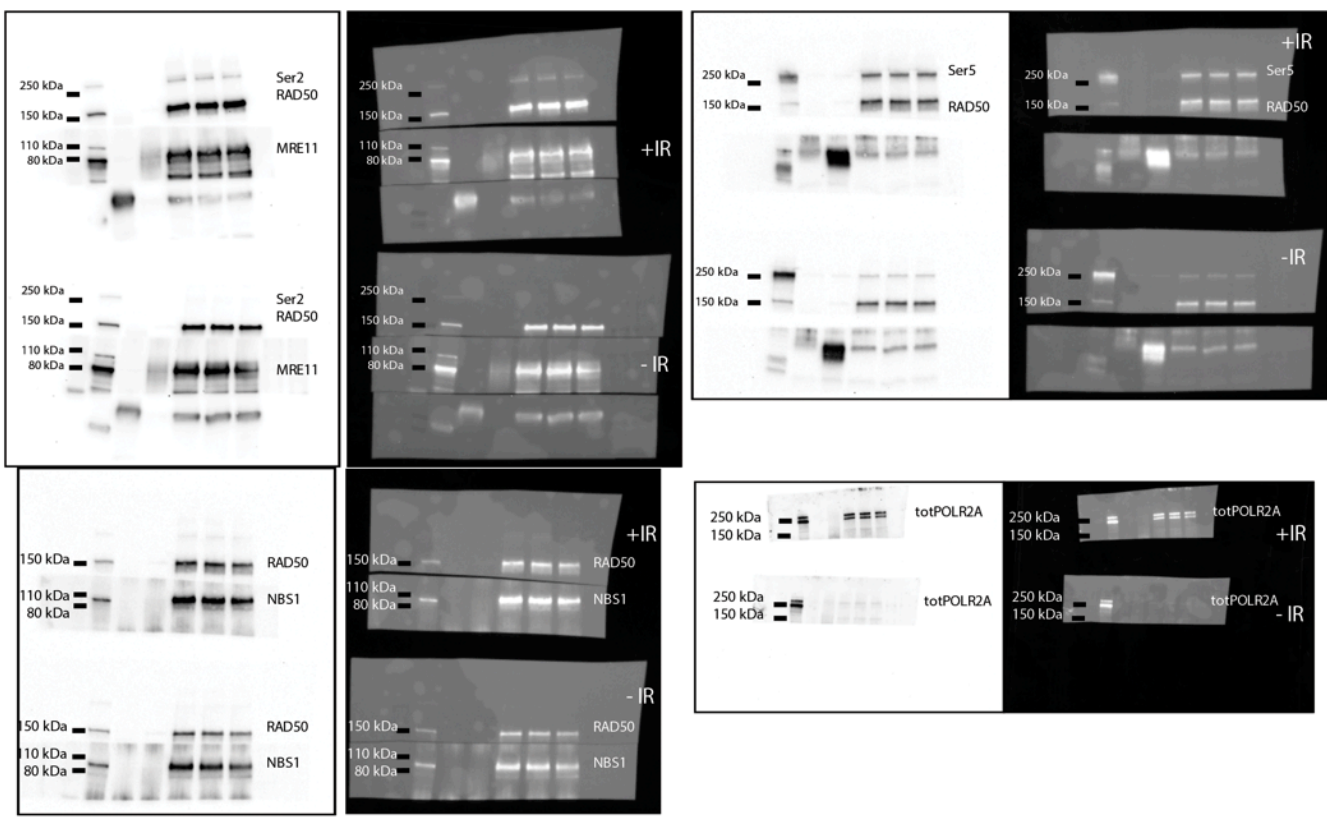

**Unprocessed blot relative to Figure 3E**

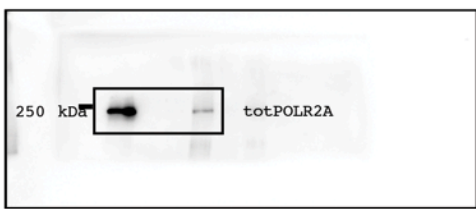

**Unprocessed blots relative to Supplementary Figure 3K**

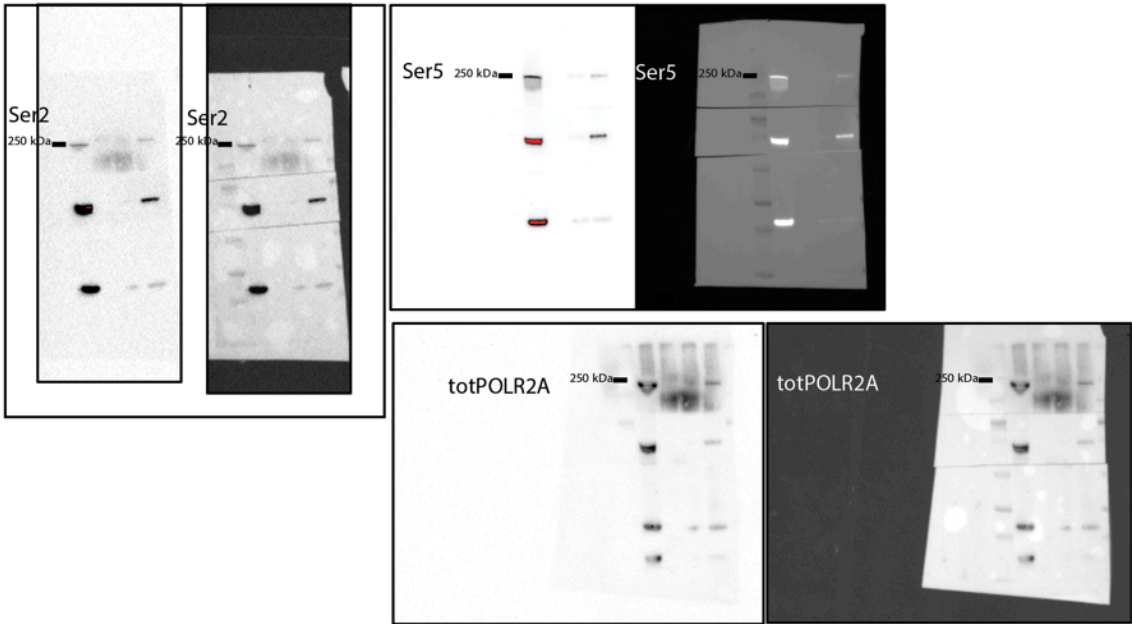

Supplement: NIHMS74503-supplement-10.pdf [file NIHMS74503-supplement-10.pdf]
