# Supplementary material
Source: PubMed Central journal article supplement (PMC5714282)

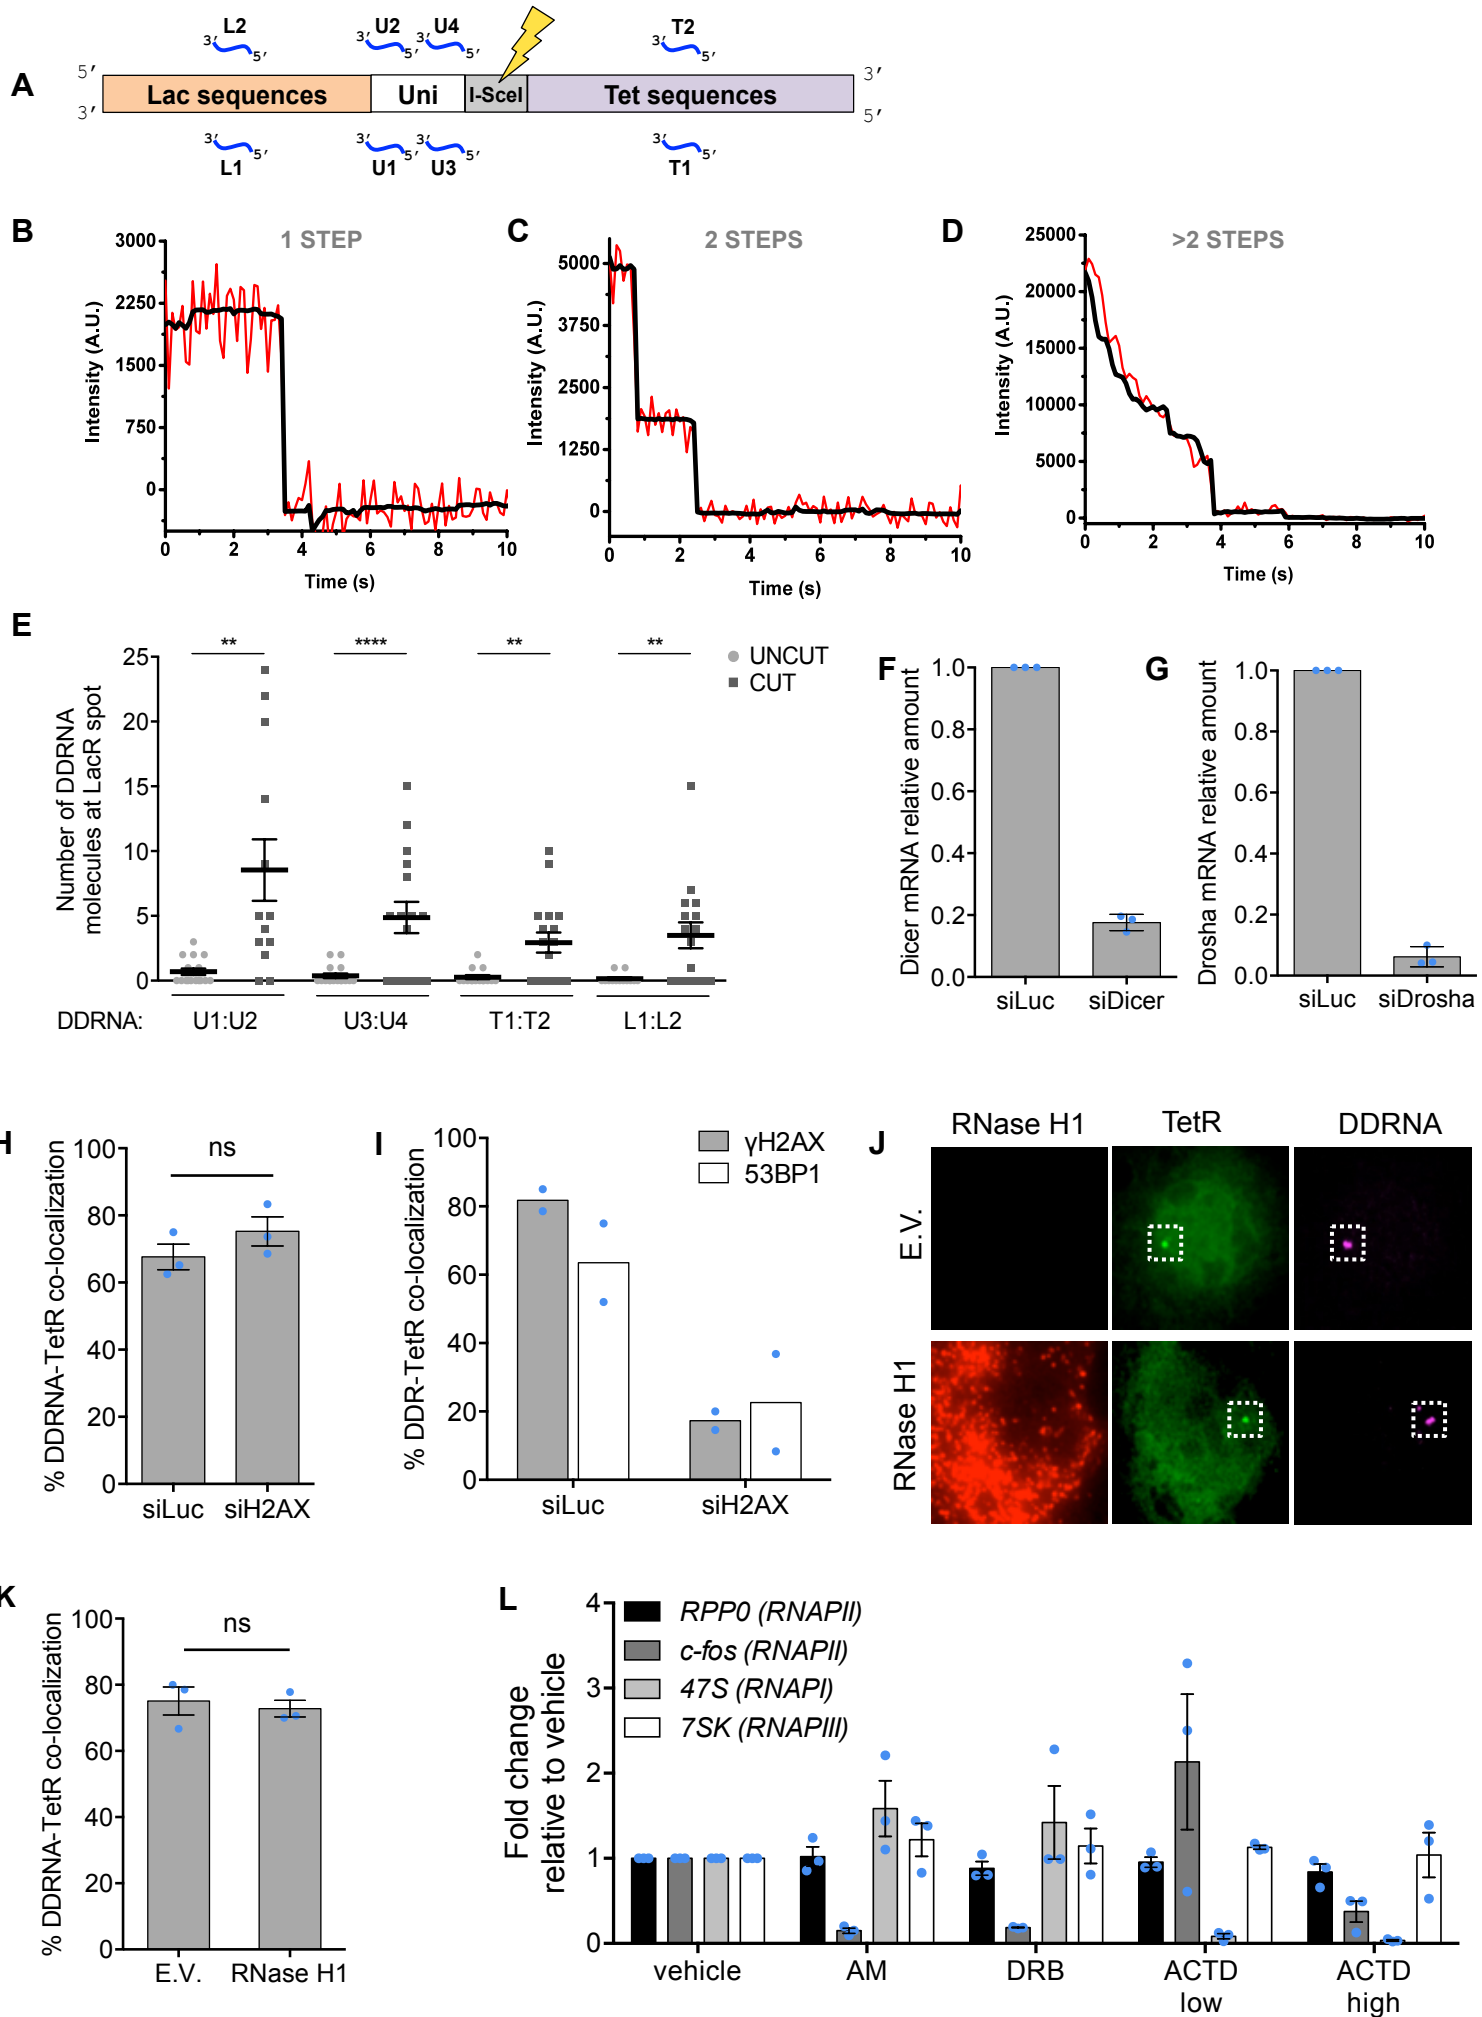

Supplement: NIHMS74503-supplement-2.pdf [file NIHMS74503-supplement-2.pdf]

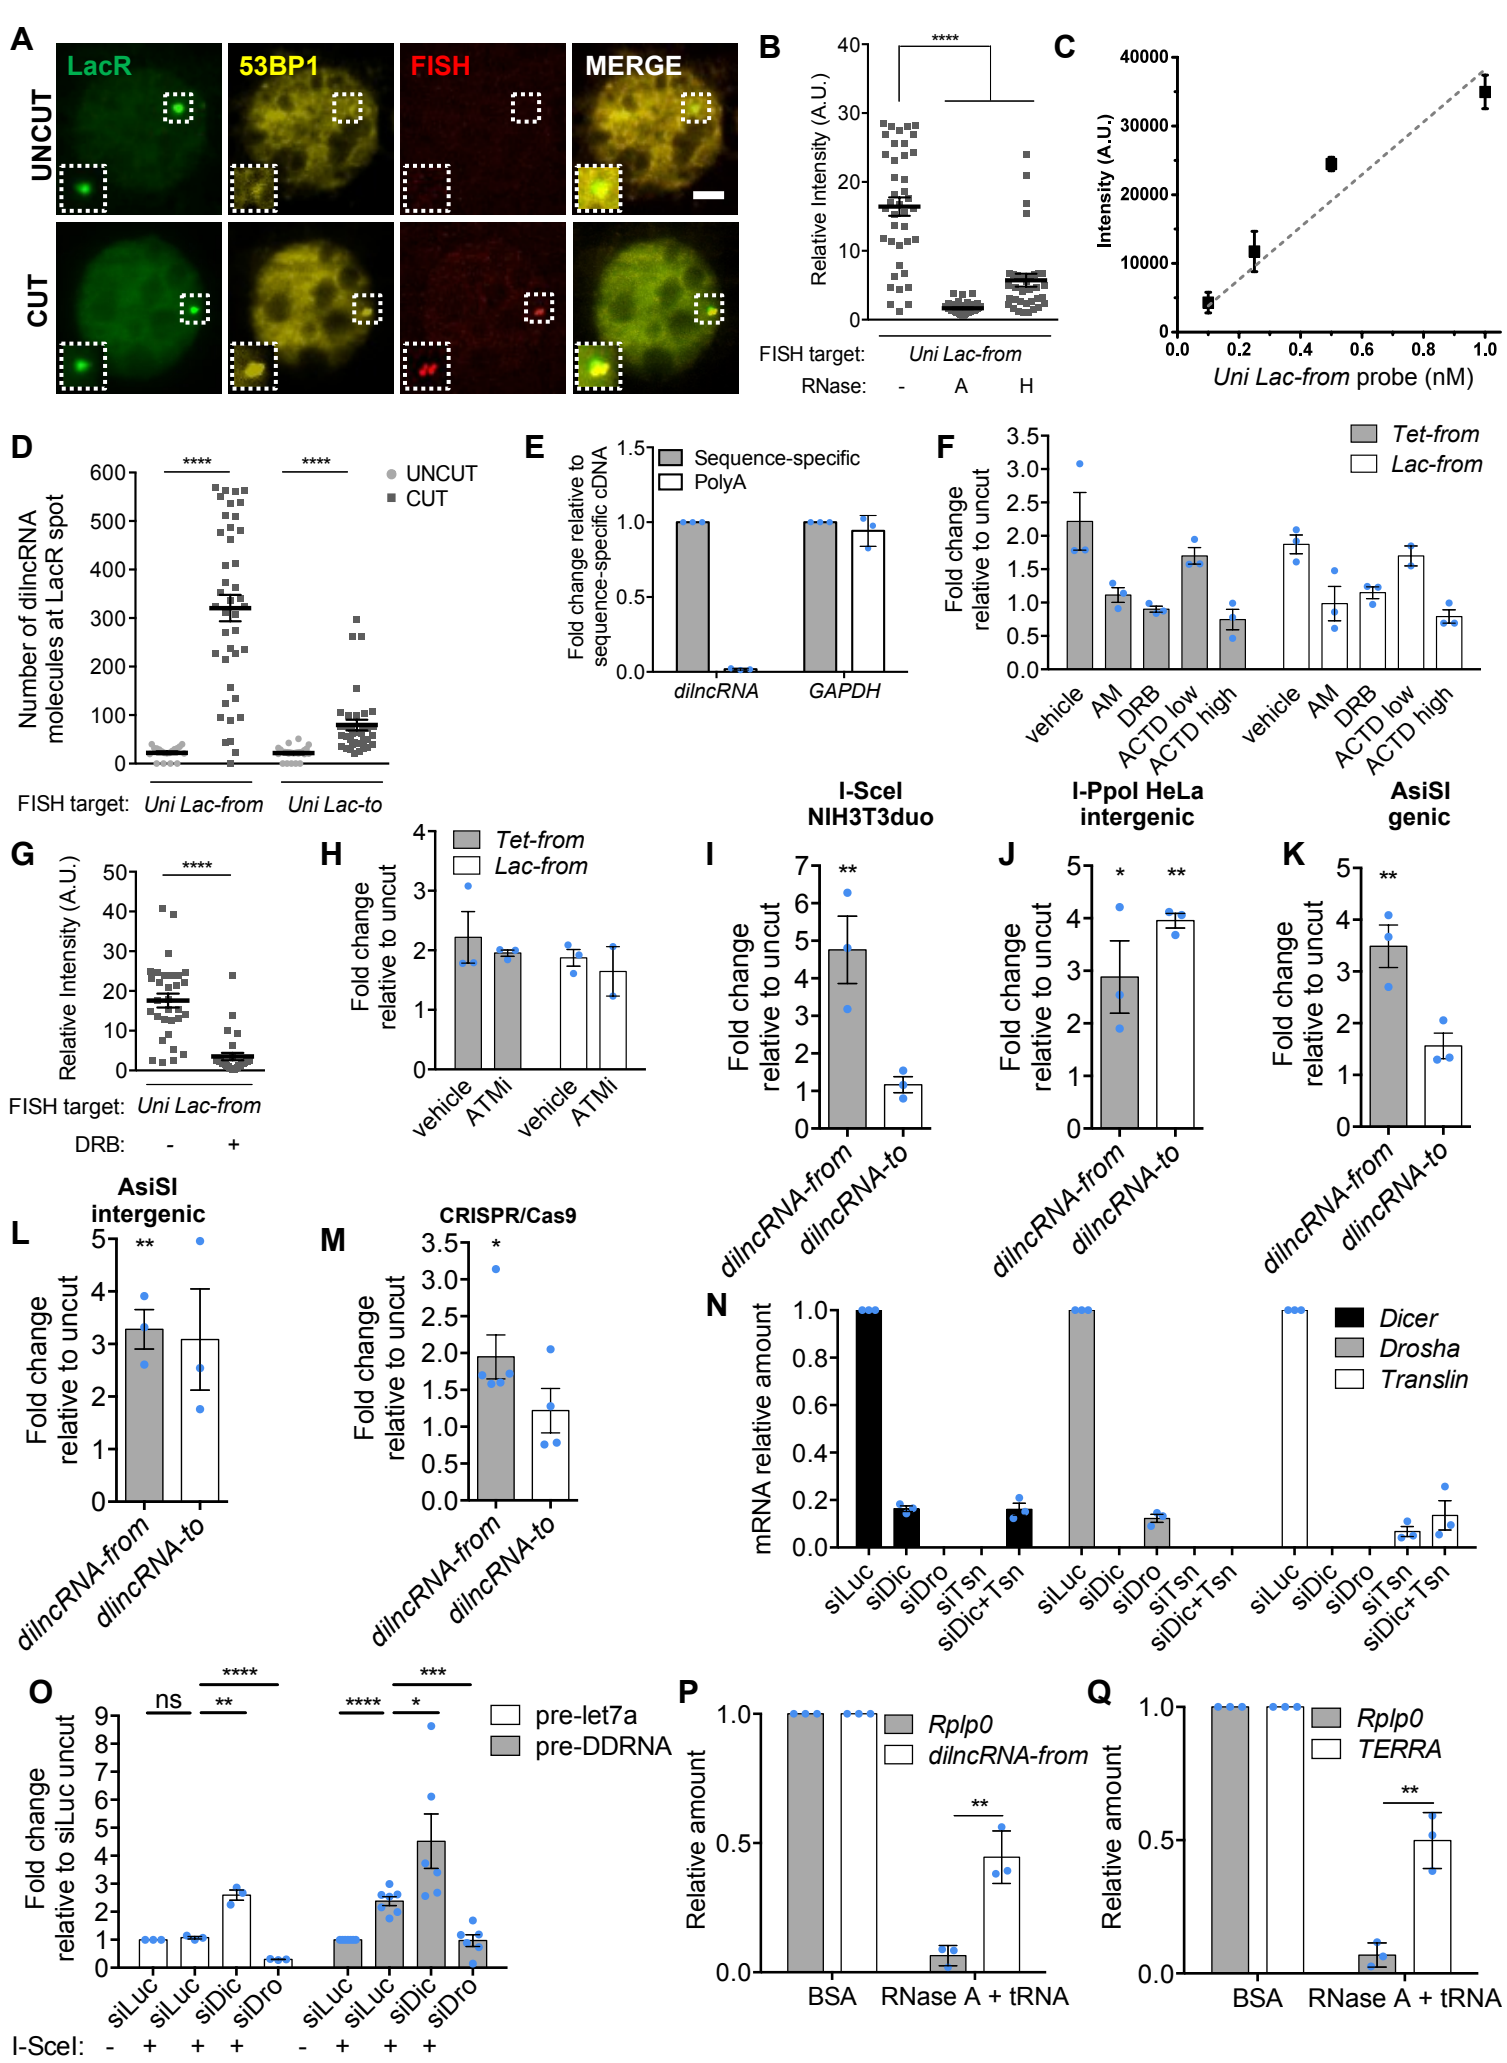

Supplement: NIHMS74503-supplement-3.pdf [file NIHMS74503-supplement-3.pdf]

**A**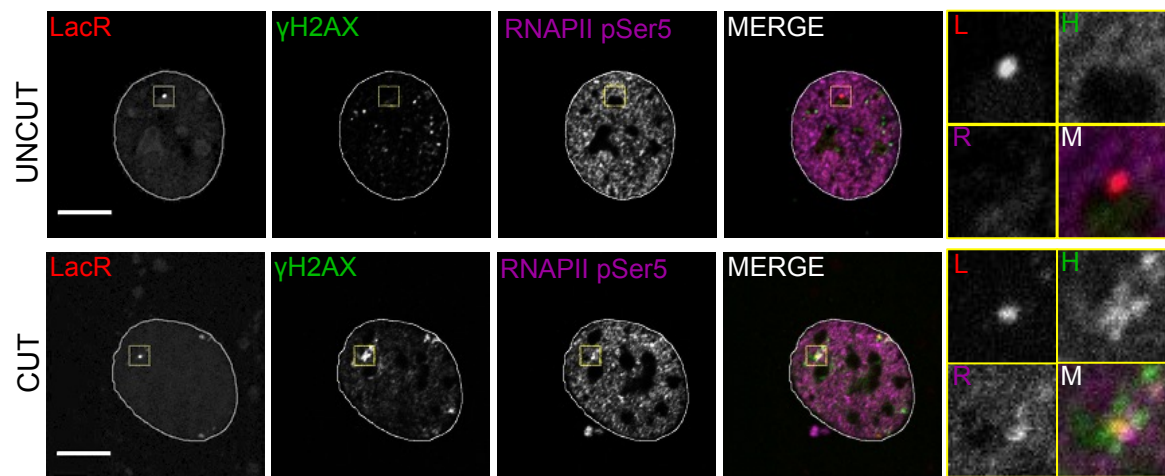**B**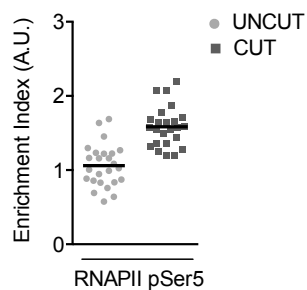**C**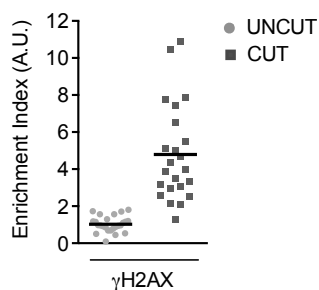**D**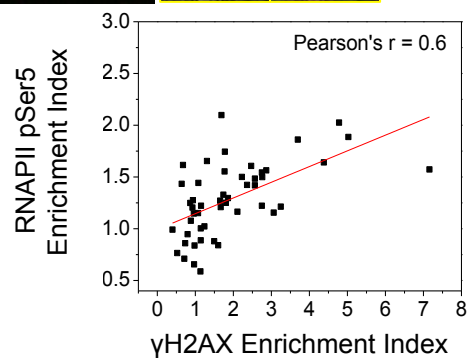**E**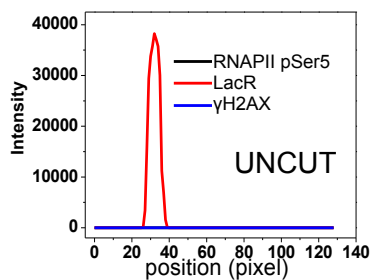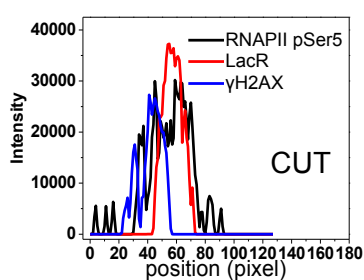**F**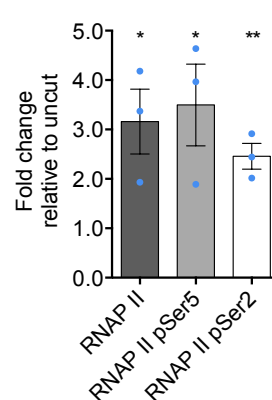**G**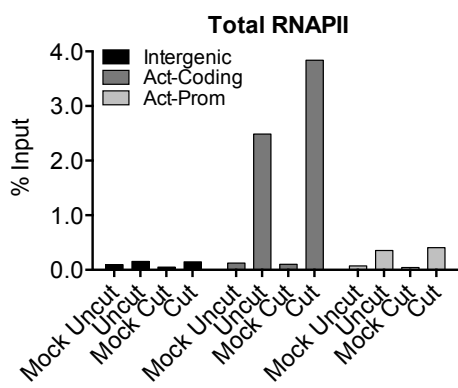**H**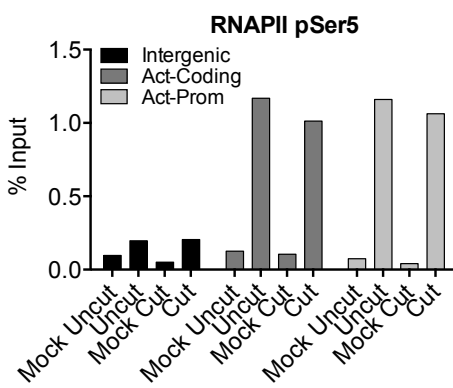**I**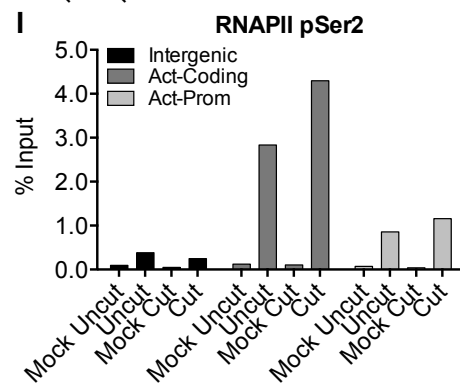**J**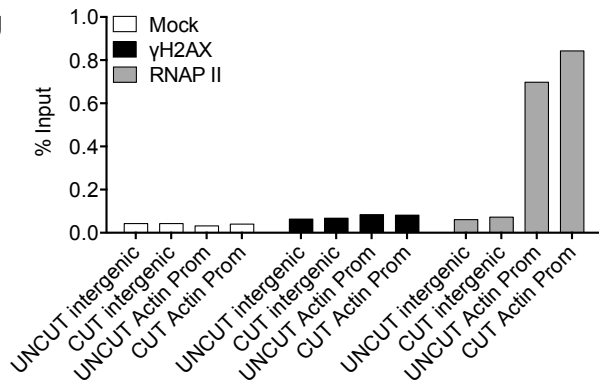**K**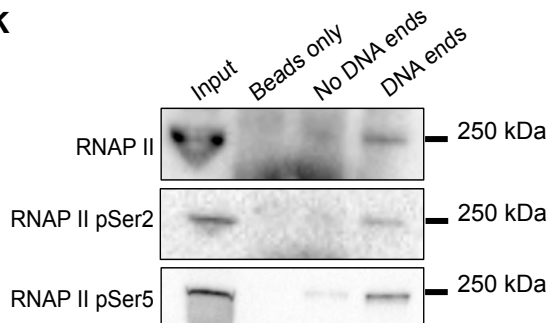

Supplement: NIHMS74503-supplement-4.pdf [file NIHMS74503-supplement-4.pdf]

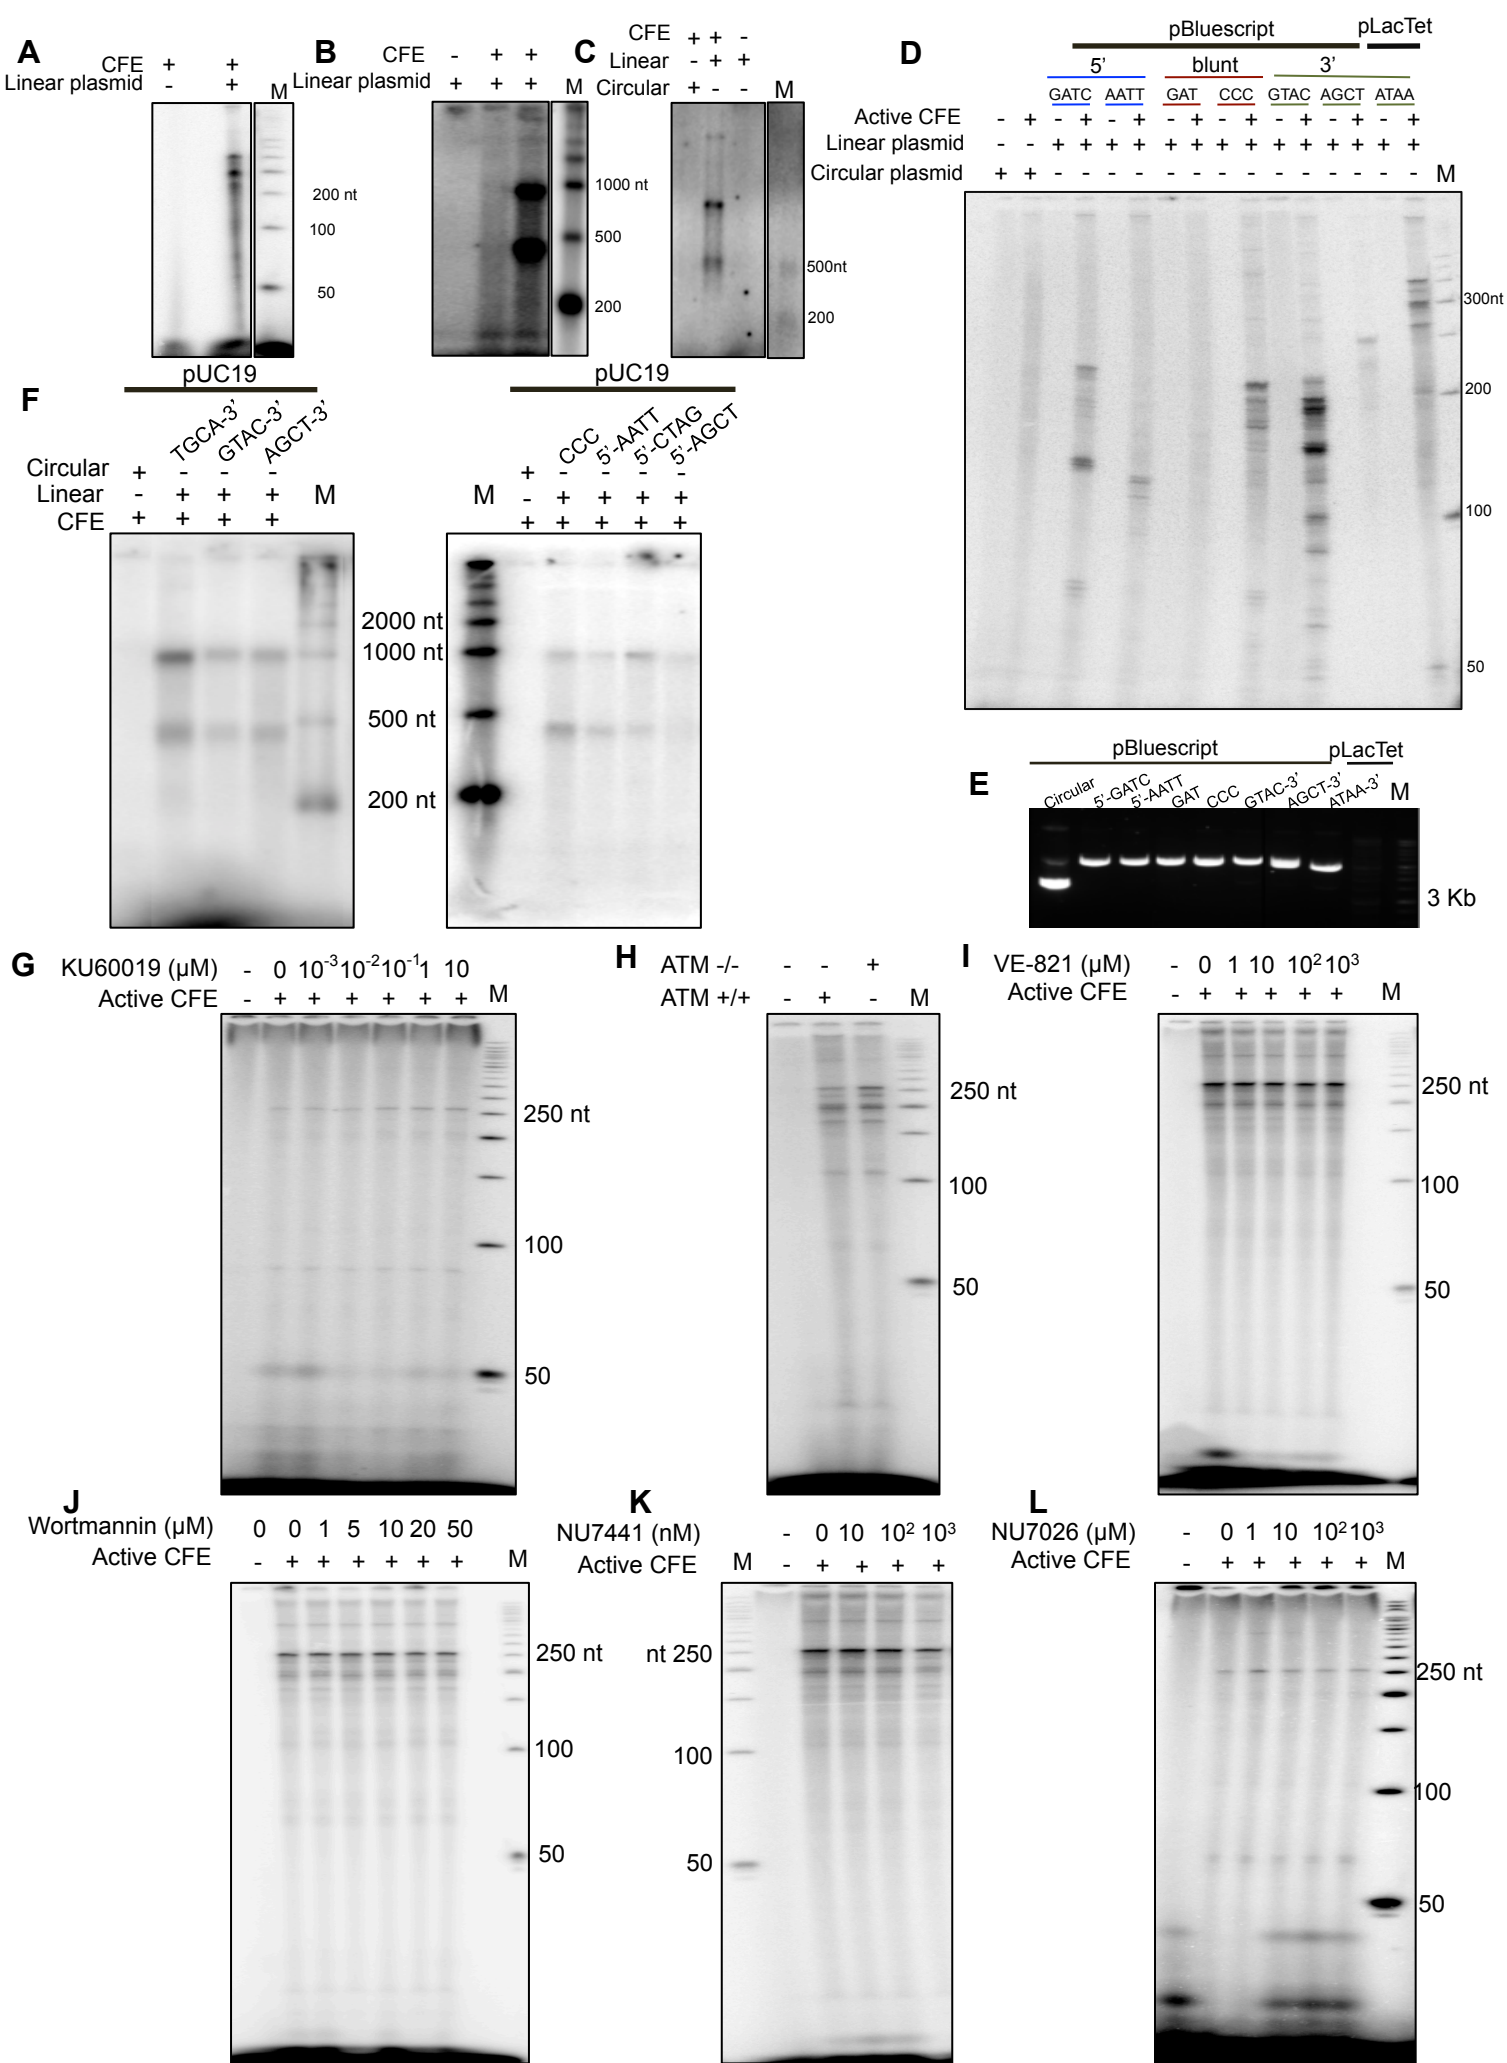

Supplement: NIHMS74503-supplement-5.pdf [file NIHMS74503-supplement-5.pdf]

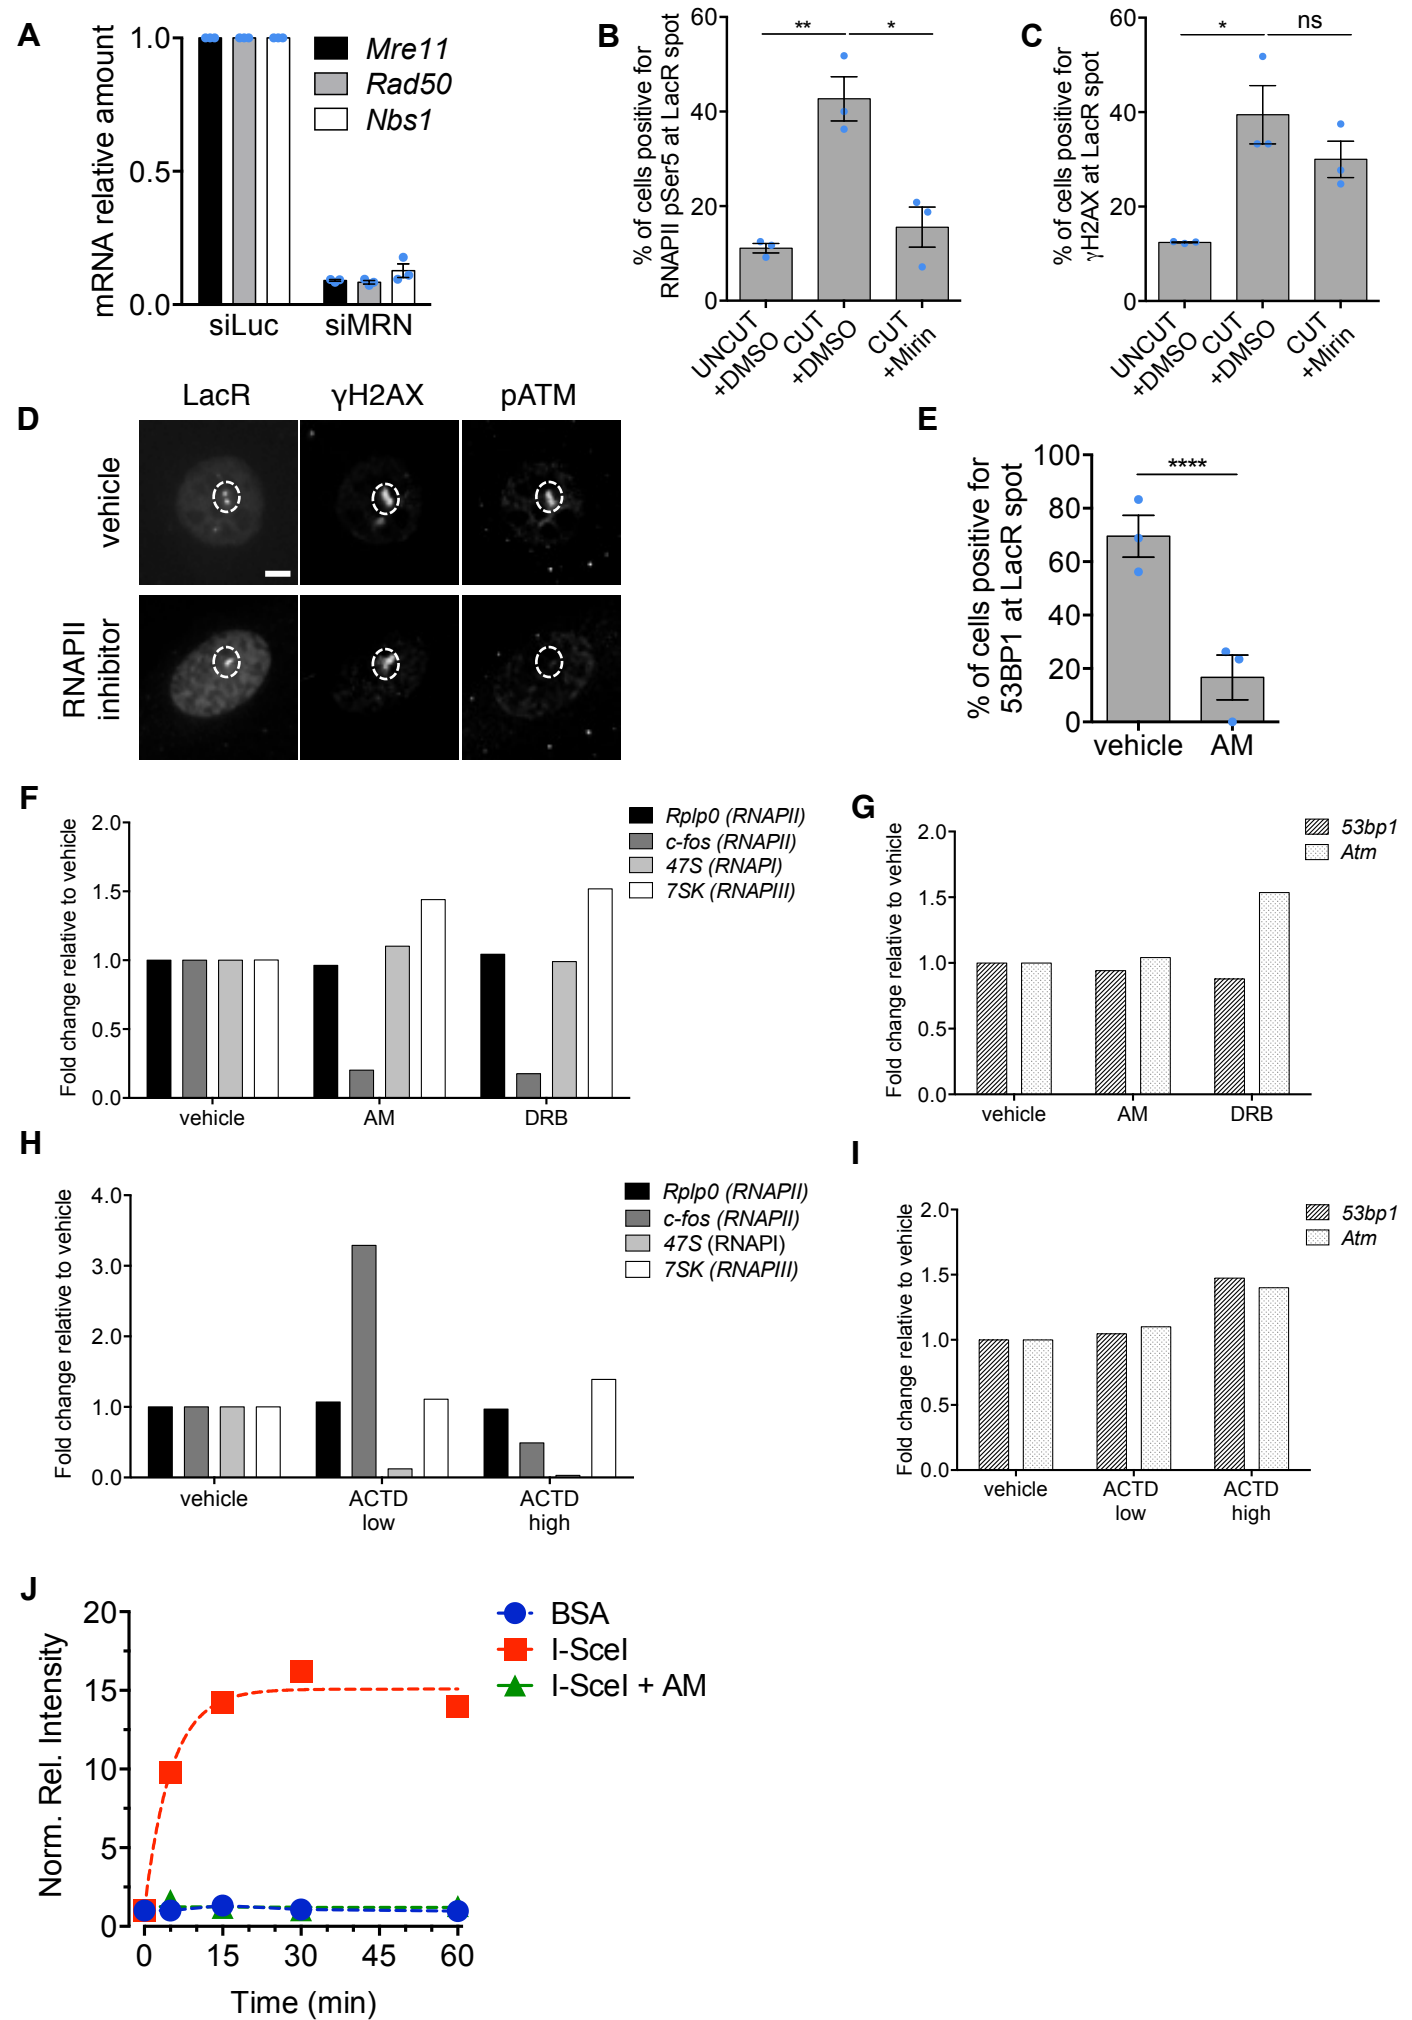

Supplement: NIHMS74503-supplement-6.pdf [file NIHMS74503-supplement-6.pdf]

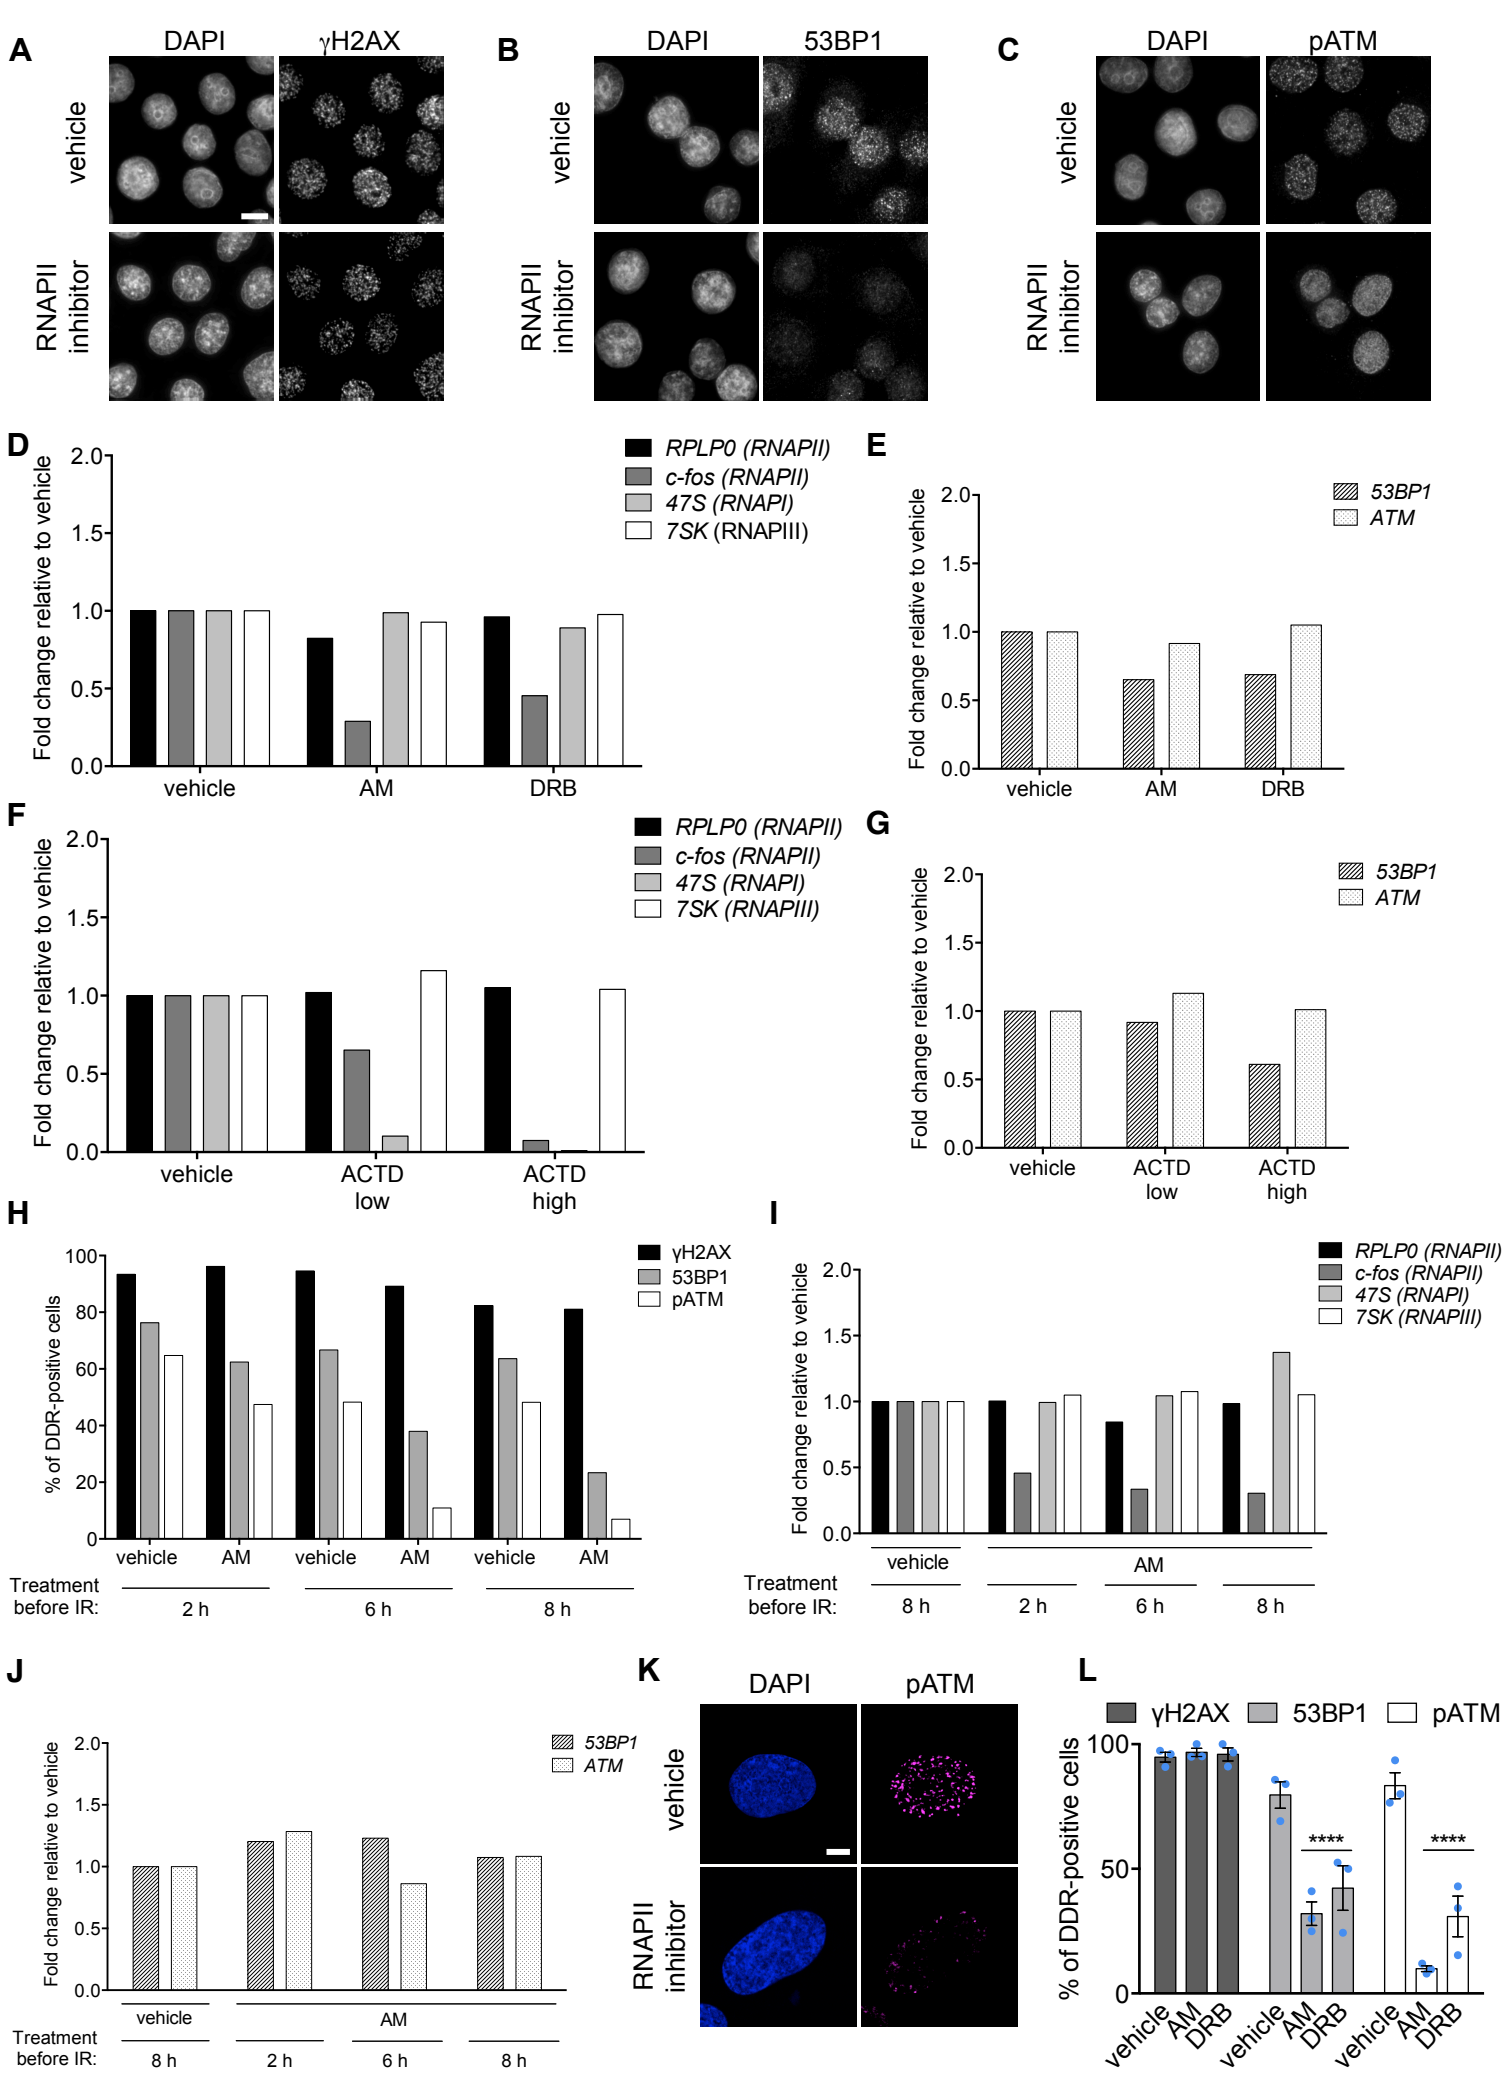

Supplement: NIHMS74503-supplement-7.pdf [file NIHMS74503-supplement-7.pdf]

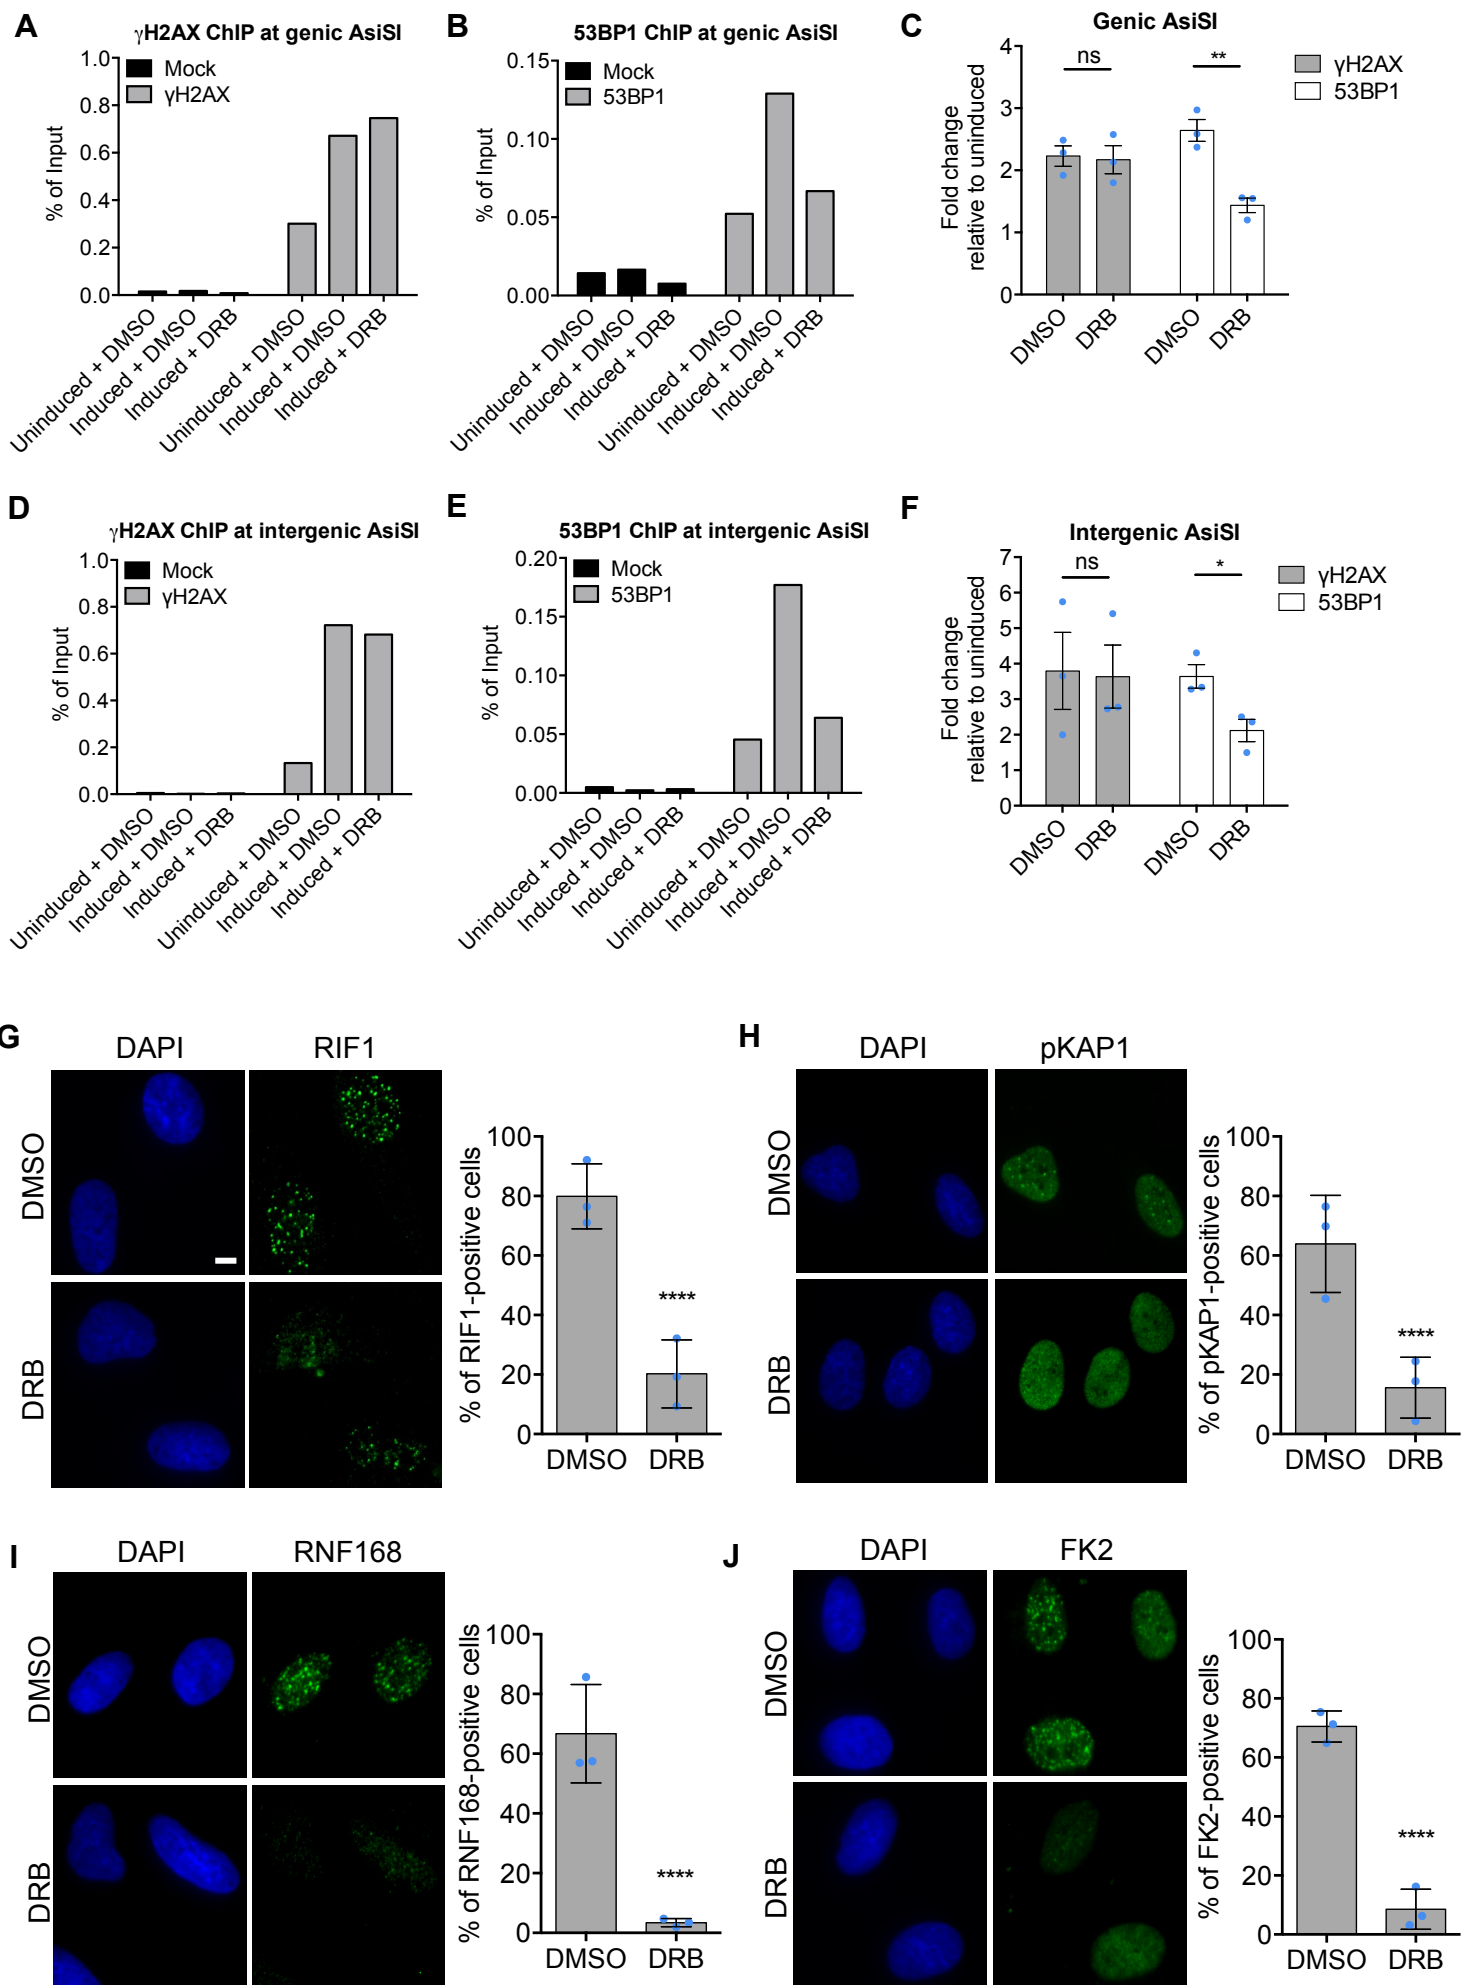

Supplement: NIHMS74503-supplement-8.pdf [file NIHMS74503-supplement-8.pdf]

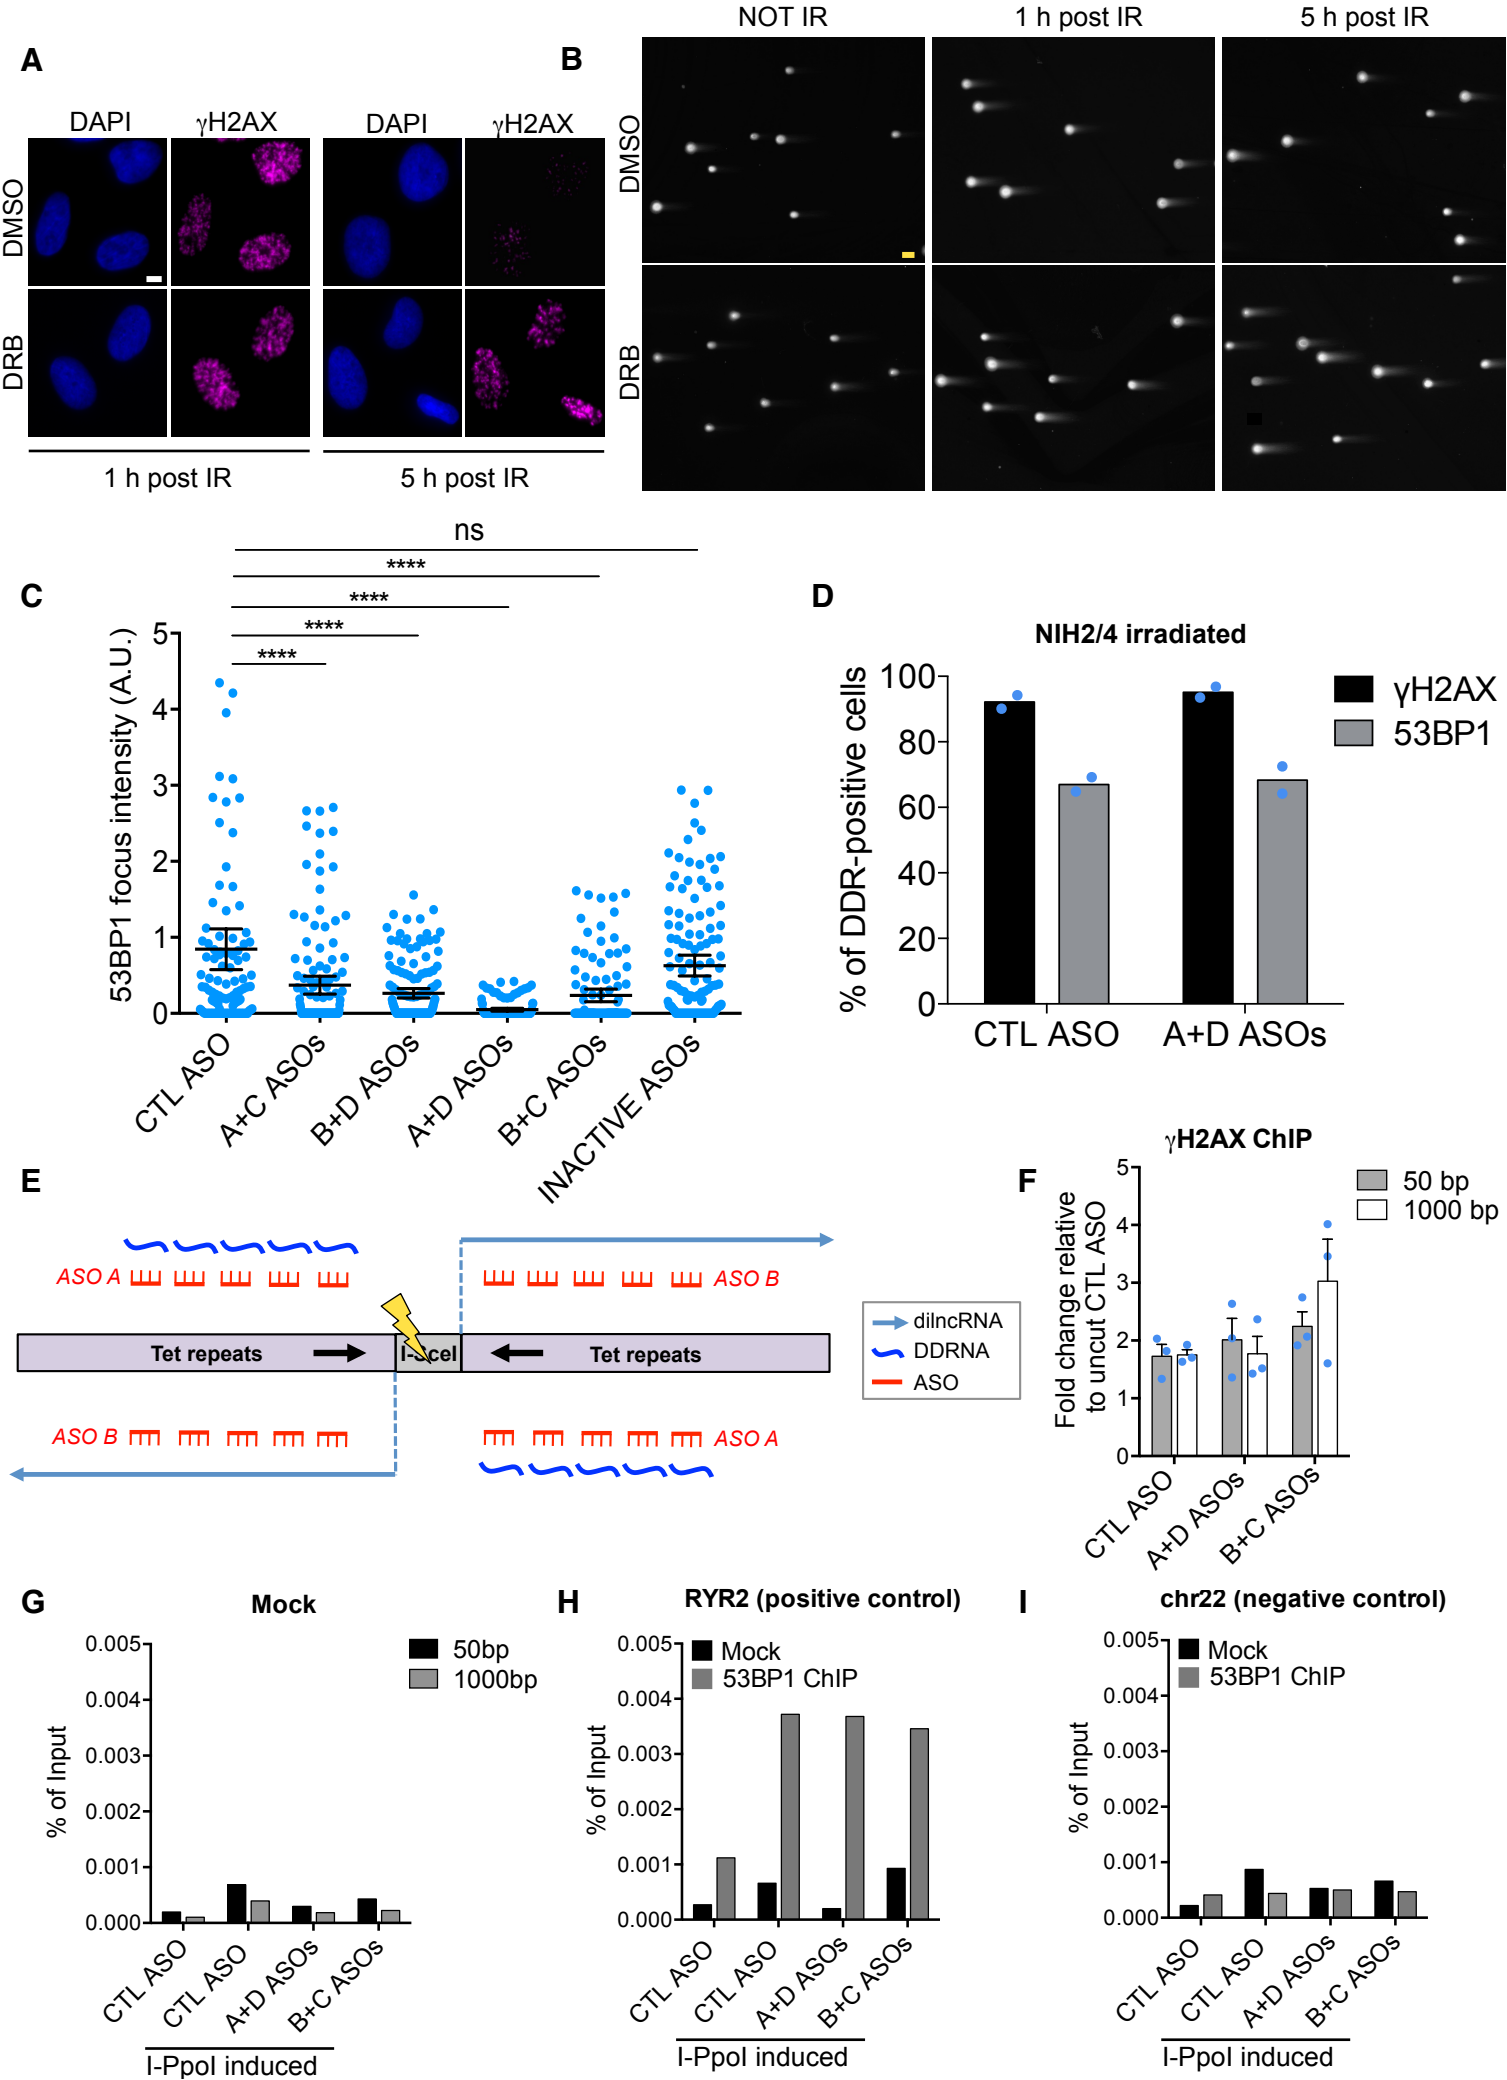

Supplement: NIHMS74503-supplement-9.pdf [file NIHMS74503-supplement-9.pdf]
